# Supplementary material for: Multiresistant Bacteria Isolated from Activated Sludge in Austria
Source: PubMed Central journal article supplement (PMC5877024; doi:10.3390/ijerph15030479), 2018-03-09
Supplement: ijerph-15-00479-s001.pdf [file ijerph-15-00479-s001.pdf]

Table S1: Antibiotics, disk content and breakpoints used for disk susceptibility testing according to the EUCAST guidelines (EUCAST V2.0, 2012).

| Species                          | Antibiotic                          | Disk content<br>(µg)          | Zone diameter (mm) breakpoints <sup>a</sup> |     |
|----------------------------------|-------------------------------------|-------------------------------|---------------------------------------------|-----|
|                                  |                                     |                               | S ≥                                         | R < |
| Enterobacteriaceae               | ampicillin (AM)                     | 10                            | 14                                          | 14  |
|                                  | amoxicillin/clavulanic acid (AMC)   | 20+10                         | 17                                          | 17  |
|                                  | cephalexin (CN)                     | 30                            | 12                                          | 12  |
|                                  | cefuroxime (CXM)                    | 30                            | 18                                          | 18  |
|                                  | cefoxitin (FOX)                     | 30                            | 19                                          | 19  |
|                                  | cefotaxime (CTX)                    | 5                             | 20                                          | 17  |
|                                  | moxifloxacin (MXF)                  | 5                             | 20                                          | 17  |
|                                  | ciprofloxacin (CIP)                 | 5                             | 22                                          | 19  |
|                                  | trimethoprim/sulfamethoxazole (SXT) | 1,25+23,75                    | 16                                          | 13  |
|                                  | gentamicin (GM)                     | 10                            | 17                                          | 14  |
|                                  | meropenem (MEM)                     | 10                            | 22                                          | 16  |
|                                  | imipenem (IPM)                      | 10                            | 22                                          | 16  |
|                                  | cefepime (FEP)                      | 30                            | 24                                          | 21  |
|                                  | ceftazidime (CAZ)                   | 10                            | 22                                          | 19  |
|                                  | piperacillin/tazobactam (TZP)       | 30+6                          | 20                                          | 17  |
|                                  | tetracycline (TE) <sup>b</sup>      | 30                            | 15                                          | 11  |
|                                  | chloramphenicol (C) <sup>b</sup>    | 30                            | 18                                          | 12  |
| nalidixic acid (NA) <sup>b</sup> | 30                                  | 19                            | 13                                          |     |
| Enterococcus spp.                | ampicillin (AM)                     | 2                             | 10                                          | 8   |
|                                  | vancomycin (VA)                     | 5                             | 12                                          | 12  |
|                                  | teicoplanin (TEC)                   | 30                            | 16                                          | 16  |
|                                  | linezolid (LZD)                     | 10                            | 19                                          | 19  |
|                                  | tigecycline (TGC)                   | 15                            | 18                                          | 15  |
| Staphylococcus spp.              | penicillin (P)                      | 1                             | 26                                          | 26  |
|                                  | cefoxitin (FOX)                     | 30                            | 22                                          | 22  |
|                                  | tetracycline (TE)                   | 30                            | 22                                          | 19  |
|                                  | erythromycin (E)                    | 15                            | 21                                          | 18  |
|                                  | clindamycin (CL)                    | 2                             | 22                                          | 19  |
|                                  | norfloxacin (NOR)                   | 10                            | 17                                          | 17  |
|                                  | amicazin (AN)                       | 30                            | 18                                          | 16  |
|                                  | gentamicin (GM)                     | 10                            | 18                                          | 18  |
|                                  | trimethoprim/sulfamethoxazole (SXT) | 1,25+23,75                    | 17                                          | 14  |
|                                  | fusidic acid (FA)                   | 10                            | 24                                          | 24  |
|                                  | rifampicin (RIF)                    | 5                             | 26                                          | 23  |
|                                  | linezolid (LZD)                     | 10                            | 19                                          | 19  |
|                                  | mupirocin (MUP)                     | 200                           | 30                                          | 18  |
|                                  | Pseudomonas spp.                    | piperacillin/tazobactam (TZP) | 30+6                                        | 19  |
| ceftazidime (CAZ)                |                                     | 10                            | 16                                          | 16  |
| cefepime (FEP)                   |                                     | 30                            | 18                                          | 18  |
| meropenem (MEM)                  |                                     | 10                            | 24                                          | 18  |
| imipenem (IPM)                   |                                     | 10                            | 20                                          | 17  |
| amicazin (AN)                    |                                     | 30                            | 18                                          | 15  |
| gentamicin (GM)                  |                                     | 10                            | 15                                          | 15  |
| tobramycin (NN)                  |                                     | 10                            | 16                                          | 16  |
| ciprofloxacin (CIP)              |                                     | 5                             | 25                                          | 22  |
| levofloxacin (LEV)               |                                     | 5                             | 20                                          | 17  |

<sup>a</sup> Zone diameter value used to indicate susceptible (S) and resistant (R)

<sup>b</sup> Enterobacteriaceae tested for tetracycline, chloramphenicol and nalidixic acid were evaluated in conformity with Clinical Laboratory Standards Institute (CLSI, 2011) guidelines. There are no interpretation guidelines for zone diameters of these three antibiotics according to EUCAST.
